# Supplementary material for: Food Plant Secondary Metabolites Antiviral Activity and Their Possible Roles in SARS-CoV-2 Treatment: An Overview
Source: MDPI journal article supplement (doi:10.3390/molecules28062470), 2023-03-08
Supplement: s1 [file s1]

**Supplementary Table S1** Clinical trials investigating the effects of selected phytochemicals in prophylaxis and/or the treatment of SARS-COV-2

| Compounds                                                                                                             | Official Title                                                                                                                                                                                                                                 | Intervention/<br>treatment                                                                                                | Types of Phytochemicals<br>Combinations Used                               | ClinicalTrials.gov<br>Identifier | References                                                                                                                                                                                                                                            |
|-----------------------------------------------------------------------------------------------------------------------|------------------------------------------------------------------------------------------------------------------------------------------------------------------------------------------------------------------------------------------------|---------------------------------------------------------------------------------------------------------------------------|----------------------------------------------------------------------------|----------------------------------|-------------------------------------------------------------------------------------------------------------------------------------------------------------------------------------------------------------------------------------------------------|
| Caffeic acid<br>Chlorogenic acid<br>Gallic acid<br>p-Coumaric acid<br>Apigenin<br>Luteolin<br>Catechin<br>Epicatechin | Randomized Clinical Trial of<br>Açaí Palm Berry Extract as an<br>Intervention in Patients<br>Diagnosed With COVID-19                                                                                                                           | Dietary Supplement:<br>Açaí palm berry extract<br>- natural product                                                       | Polyphenol-rich extracts                                                   | NCT04404218                      | <a href="https://clinicaltrials.gov/ct2/show/NCT04404218?term=caffeic+acid&amp;cond=COVID-19&amp;draw=2&amp;rank=1">https://clinicaltrials.gov/ct2/show/NCT04404218?term=caffeic+acid&amp;cond=COVID-19&amp;draw=2&amp;rank=1</a>                     |
| Ferulic acid                                                                                                          | Retrospective Observational<br>Study to Describe the Evolution<br>of SARS-CoV-2 Disease and the<br>Profile of Patients Treated or<br>Not With Imuno TF® and a<br>Combination of Nutraceuticals<br>and Who Have Tested Positive<br>for COVID-19 | Dietary Supplement:<br>ImmunoFormulation                                                                                  | Polyphenols in<br>combination with other<br>natural bioactive<br>compounds | NCT04666753                      | <a href="https://clinicaltrials.gov/ct2/show/NCT04666753?term=Ferulic+acid&amp;cond=COVID-19&amp;draw=2&amp;rank=1">https://clinicaltrials.gov/ct2/show/NCT04666753?term=Ferulic+acid&amp;cond=COVID-19&amp;draw=2&amp;rank=1</a>                     |
| Luteolin                                                                                                              | Effects of<br>Palmitoylethanolamide Co-<br>ultramicronized With Luteoline<br>(Pea-lut) on Frontal Lobe<br>Functions and GABAergic<br>Transmission in Long Covid<br>Patients. An 8-week<br>Randomized Controlled Trial                          | Dietary Supplement:<br>palmitoylethanolamide<br>co-ultramicronized<br>with antioxidant<br>flavonoid luteolin<br>(PEA-LUT) | Polyphenols in<br>combination with other<br>natural bioactive<br>compounds | NCT05311852                      | <a href="https://clinicaltrials.gov/ct2/show/NCT05311852?term=Luteolin&amp;cond=COVID-19&amp;draw=2&amp;rank=1">https://clinicaltrials.gov/ct2/show/NCT05311852?term=Luteolin&amp;cond=COVID-19&amp;draw=2&amp;rank=1</a>                             |
|                                                                                                                       | Olfactory Dysfunction After<br>COVID-19: Conventional<br>Therapy Versus Intervention<br>Treatment With Co-ultraPEALut                                                                                                                          | Combination Product:<br>co-ultraPEALut                                                                                    | Polyphenols in<br>combination with other<br>natural bioactive<br>compounds | NCT04853836                      | <a href="https://clinicaltrials.gov/ct2/show/NCT04853836?term=Luteolin&amp;cond=COVID-19&amp;draw=2&amp;rank=2">https://clinicaltrials.gov/ct2/show/NCT04853836?term=Luteolin&amp;cond=COVID-19&amp;draw=2&amp;rank=2</a>                             |
| Cyanidin-3-O-glucoside                                                                                                | Dose-response Study a<br>Glucoside- and Rutinoside-rich<br>Crude Material in Relieving Side<br>Effects of COVID-19 Vaccines                                                                                                                    | Dietary Supplement:<br>Mulberry juice                                                                                     | Polyphenol-rich extracts                                                   | NCT05387252                      | <a href="https://clinicaltrials.gov/ct2/show/NCT05387252?term=Cyanidin-3-O-glucoside&amp;cond=COVID-19&amp;draw=2&amp;rank=1">https://clinicaltrials.gov/ct2/show/NCT05387252?term=Cyanidin-3-O-glucoside&amp;cond=COVID-19&amp;draw=2&amp;rank=1</a> |

|           |                                                                                                                                                                                                |                                                                                                                    |                                                                             |             |                                                                                                                                                                                                                             |
|-----------|------------------------------------------------------------------------------------------------------------------------------------------------------------------------------------------------|--------------------------------------------------------------------------------------------------------------------|-----------------------------------------------------------------------------|-------------|-----------------------------------------------------------------------------------------------------------------------------------------------------------------------------------------------------------------------------|
| Quercetin | A Prospective, Randomized, Open-labelled, Controlled Trial to Study the Adjuvant Benefits of Quercetin Phytosome in Patients With Diagnosis of COVID-19                                        | Drug: Standard COVID-19 care<br>Dietary Supplement: Quercetin Phytosome                                            | Polyphenols in combination with other natural bioactive compounds and drugs | NCT04578158 | <a href="https://clinicaltrials.gov/ct2/show/NCT04578158?term=Quercetin&amp;cond=COVID-19&amp;draw=2&amp;rank=1">https://clinicaltrials.gov/ct2/show/NCT04578158?term=Quercetin&amp;cond=COVID-19&amp;draw=2&amp;rank=1</a> |
|           | The Possible Effect of Quercetin on Prophylaxis and Treatment of COVID-19                                                                                                                      | Dietary Supplement: Quercetin Prophylaxis<br>Dietary Supplement: Quercetin Treatment                               | Pure polyphenols                                                            | NCT04377789 | <a href="https://clinicaltrials.gov/ct2/show/NCT04377789?term=Quercetin&amp;cond=COVID-19&amp;draw=2&amp;rank=2">https://clinicaltrials.gov/ct2/show/NCT04377789?term=Quercetin&amp;cond=COVID-19&amp;draw=2&amp;rank=2</a> |
|           | Study to Investigate the Benefits of Dietary Supplement Quercetin for Early Symptoms of COVID-19                                                                                               | Drug: standard of care for COVID-19 as per the hospital guidelines<br>Dietary Supplement: Quercetin Phytosome (QP) | Polyphenols in combination with other natural bioactive compounds and drugs | NCT04861298 | <a href="https://clinicaltrials.gov/ct2/show/NCT04861298?term=Quercetin&amp;cond=COVID-19&amp;draw=2&amp;rank=3">https://clinicaltrials.gov/ct2/show/NCT04861298?term=Quercetin&amp;cond=COVID-19&amp;draw=2&amp;rank=3</a> |
|           | The Study of Quadruple Therapy Zinc, Quercetin, Bromelain and Vitamin C on the Clinical Outcomes of Patients Infected With COVID-19                                                            | Drug: Quercetin<br>Dietary Supplement: bromelain<br>Drug: Zinc<br>Drug: Vitamin C                                  | Polyphenols in combination with other natural bioactive compounds and drugs | NCT04468139 | <a href="https://clinicaltrials.gov/ct2/show/NCT04468139?term=Quercetin&amp;cond=COVID-19&amp;draw=2&amp;rank=4">https://clinicaltrials.gov/ct2/show/NCT04468139?term=Quercetin&amp;cond=COVID-19&amp;draw=2&amp;rank=4</a> |
|           | Treatment Benefits of Flavonoids Quercetin and Curcumin Supplements for Mild Symptoms of COVID-19                                                                                              | Drug: Standard of care<br>Dietary Supplement: Investigational treatment                                            | Polyphenols in combination with drugs                                       | NCT05130671 | <a href="https://clinicaltrials.gov/ct2/show/NCT05130671?term=Quercetin&amp;cond=COVID-19&amp;draw=2&amp;rank=5">https://clinicaltrials.gov/ct2/show/NCT05130671?term=Quercetin&amp;cond=COVID-19&amp;draw=2&amp;rank=5</a> |
|           | Randomized, Placebo-controlled Clinical Trial to Evaluate the Efficacy of an Oral Nutritional Supplement Based on Quercetin in the Prevention of Covid-19 Infection for a Duration of 3 Months | Dietary Supplement: Quercetin                                                                                      | Pure polyphenols                                                            | NCT05037240 | <a href="https://clinicaltrials.gov/ct2/show/NCT05037240?term=Quercetin&amp;cond=COVID-19&amp;draw=2&amp;rank=6">https://clinicaltrials.gov/ct2/show/NCT05037240?term=Quercetin&amp;cond=COVID-19&amp;draw=2&amp;rank=6</a> |

|                                   |                                                                                                                                                                                                             |                                                                                                            |                                                                             |             |                                                                                                                                                                                                                                                               |
|-----------------------------------|-------------------------------------------------------------------------------------------------------------------------------------------------------------------------------------------------------------|------------------------------------------------------------------------------------------------------------|-----------------------------------------------------------------------------|-------------|---------------------------------------------------------------------------------------------------------------------------------------------------------------------------------------------------------------------------------------------------------------|
|                                   | Complementary Therapy of Dietary Supplements Curcumin, Quercetin and Vitamin D3 for Mild to Moderate Symptoms of COVID-19                                                                                   | Dietary Supplement: Complementary therapy<br>Drug: Standard of care                                        | Polyphenols in combination with other natural bioactive compounds           | NCT04603690 | <a href="https://clinicaltrials.gov/ct2/show/NCT04603690?term=Quercetin&amp;cond=COVID-19&amp;draw=2&amp;rank=7">https://clinicaltrials.gov/ct2/show/NCT04603690?term=Quercetin&amp;cond=COVID-19&amp;draw=2&amp;rank=7</a>                                   |
|                                   | The Effectiveness of Phytotherapy in the Treatment of SARS-COV2 (COVID-19)                                                                                                                                  | Drug: Quercetin                                                                                            | Pure polyphenols                                                            | NCT04851821 | <a href="https://clinicaltrials.gov/ct2/show/NCT04851821?term=Quercetin&amp;cond=COVID-19&amp;draw=2&amp;rank=9">https://clinicaltrials.gov/ct2/show/NCT04851821?term=Quercetin&amp;cond=COVID-19&amp;draw=2&amp;rank=9</a>                                   |
|                                   | Efficacy of Psidii Guava's Extract For Mild And Symptomless Coronavirus Disease-19 (COVID-19)                                                                                                               | Drug: Extract Psidii guava<br>Combination Product: Standard therapy for Covid-19 patient                   | Polyphenol-rich extracts                                                    | NCT04810728 | <a href="https://clinicaltrials.gov/ct2/show/NCT04810728?term=Quercetin&amp;cond=COVID-19&amp;draw=2&amp;rank=10">https://clinicaltrials.gov/ct2/show/NCT04810728?term=Quercetin&amp;cond=COVID-19&amp;draw=2&amp;rank=10</a>                                 |
|                                   | Safety and Efficacy of Hydroxychloroquine for the Treatment & Prevention of Coronavirus Disease 2019 (COVID-19) Caused by Severe Acute Respiratory Syndrome Coronavirus 2 (SARS-CoV-2)                      | Drug: Hydroxychloroquine<br>Dietary Supplement: Vitamins and Minerals<br>Drug: Azithromycin                | Polyphenols in combination with other natural bioactive compounds and drugs | NCT04590274 | <a href="https://clinicaltrials.gov/ct2/show/NCT04590274?term=Quercetin&amp;cond=COVID-19&amp;draw=3&amp;rank=11">https://clinicaltrials.gov/ct2/show/NCT04590274?term=Quercetin&amp;cond=COVID-19&amp;draw=3&amp;rank=11</a>                                 |
|                                   | A Comparative Randomized Clinical Study on Covid-19 Positive Hospitalized Patients Supplemented With NASAFYTOL                                                                                              | Dietary Supplement: NASAFYTOL®<br>Dietary Supplement: FULTIUM® -D3 800<br>Drug: Standard of care treatment | Polyphenols in combination with other natural bioactive compounds and drugs | NCT04844658 | <a href="https://clinicaltrials.gov/ct2/show/NCT04844658?term=Quercetin&amp;cond=COVID-19&amp;draw=2&amp;rank=14">https://clinicaltrials.gov/ct2/show/NCT04844658?term=Quercetin&amp;cond=COVID-19&amp;draw=2&amp;rank=14</a>                                 |
| Epigallocatechin-3-gallate (EGCG) | A Multicenter, Double-blind, Randomized, Placebo-controlled Clinical Trial to Protect Health Workers Against COVID-19 by Using Previfenon® as Chemoprophylaxis During a SARS-CoV-2 Outbreak. The HERD Study | Drug: Previfenon® (EGCG)                                                                                   | Pure polyphenols                                                            | NCT04446065 | <a href="https://clinicaltrials.gov/ct2/show/NCT04446065?term=Epigallocatechin-3-gallate&amp;cond=COVID-19&amp;draw=2&amp;rank=1">https://clinicaltrials.gov/ct2/show/NCT04446065?term=Epigallocatechin-3-gallate&amp;cond=COVID-19&amp;draw=2&amp;rank=1</a> |

|          |                                                                                                                                                                |                                                                         |                                                                   |             |                                                                                                                                                                                                                           |
|----------|----------------------------------------------------------------------------------------------------------------------------------------------------------------|-------------------------------------------------------------------------|-------------------------------------------------------------------|-------------|---------------------------------------------------------------------------------------------------------------------------------------------------------------------------------------------------------------------------|
| Curcumin | The Effect of a Mixture of Micellized Curcumin/Boswellia Serrata/Ascorbic Acid on Health-related Quality of Life in Patients With Post-acute COVID-19 Syndrome | Dietary Supplement: Curcumin/Boswellia Serrata/Ascorbic acid mixture    | Polyphenols in combination with other natural bioactive compounds | NCT05150782 | <a href="https://clinicaltrials.gov/ct2/show/NCT05150782?term=Curcumin&amp;cond=COVID-19&amp;draw=2&amp;rank=1">https://clinicaltrials.gov/ct2/show/NCT05150782?term=Curcumin&amp;cond=COVID-19&amp;draw=2&amp;rank=1</a> |
|          | Treatment Benefits of Flavonoids Quercetin and Curcumin Supplements for Mild Symptoms of COVID-19                                                              | Drug: Standard of care<br>Dietary Supplement: Investigational treatment | Polyphenols in combination with drugs                             | NCT05130671 | <a href="https://clinicaltrials.gov/ct2/show/NCT05130671?term=Curcumin&amp;cond=COVID-19&amp;draw=2&amp;rank=2">https://clinicaltrials.gov/ct2/show/NCT05130671?term=Curcumin&amp;cond=COVID-19&amp;draw=2&amp;rank=2</a> |
|          | Complementary Therapy of Dietary Supplements Curcumin, Quercetin and Vitamin D3 for Mild to Moderate Symptoms of COVID-19                                      | Dietary Supplement: Complementary therapy<br>Drug: Standard of care     | Polyphenols in combination with other natural bioactive compounds | NCT04603690 | <a href="https://clinicaltrials.gov/ct2/show/NCT04603690?term=Curcumin&amp;cond=COVID-19&amp;draw=2&amp;rank=3">https://clinicaltrials.gov/ct2/show/NCT04603690?term=Curcumin&amp;cond=COVID-19&amp;draw=2&amp;rank=3</a> |
|          | A Phase III, Double-blind , Controlled Clinical Study Designed to Evaluate the Effect of Cimetra in Patients Diagnosed With COVID-19                           | Drug: Cimetra-1<br>Drug: Cimetra-2                                      | Polyphenols in combination with other natural bioactive compounds | NCT04802382 | <a href="https://clinicaltrials.gov/ct2/show/NCT04802382?term=Curcumin&amp;cond=COVID-19&amp;draw=2&amp;rank=4">https://clinicaltrials.gov/ct2/show/NCT04802382?term=Curcumin&amp;cond=COVID-19&amp;draw=2&amp;rank=4</a> |
|          | A Phase II, Controlled Clinical Study Designed to Evaluate the Effect of ArtemiC in Patients Diagnosed With COVID-19                                           | Drug: ArtemiC                                                           | Polyphenols in combination with other natural bioactive compounds | NCT04382040 | <a href="https://clinicaltrials.gov/ct2/show/NCT04382040?term=Curcumin&amp;cond=COVID-19&amp;draw=1&amp;rank=5">https://clinicaltrials.gov/ct2/show/NCT04382040?term=Curcumin&amp;cond=COVID-19&amp;draw=1&amp;rank=5</a> |
|          | A Phase IIb, Double Blind, Placebo-controlled Clinical Study Designed to Evaluate the Effect of Cimetra in Patients Diagnosed With COVID-19                    | Drug: Treatment administration (twice a day)                            | Polyphenols in combination with other natural bioactive compounds | NCT05037162 | <a href="https://clinicaltrials.gov/ct2/show/NCT05037162?term=Curcumin&amp;cond=COVID-19&amp;draw=2&amp;rank=6">https://clinicaltrials.gov/ct2/show/NCT05037162?term=Curcumin&amp;cond=COVID-19&amp;draw=2&amp;rank=6</a> |
|          | Oral Nutritional Supplements in Treatment of Elderly Mild-to-Moderate COVID-19 (ONSITEMC)                                                                      | Dietary Supplement: Oral Nutritional Supplements                        | Polyphenols in combination with other natural bioactive compounds | NCT05629975 | <a href="https://clinicaltrials.gov/ct2/show/NCT05629975?term=Curcumin&amp;cond=COVID-19&amp;draw=2&amp;rank=7">https://clinicaltrials.gov/ct2/show/NCT05629975?term=Curcumin&amp;cond=COVID-19&amp;draw=2&amp;rank=7</a> |

|                                                |                                                                                                                                                                                                            |                                                                                                            |                                                                             |             |                                                                                                                                                                                                                                 |
|------------------------------------------------|------------------------------------------------------------------------------------------------------------------------------------------------------------------------------------------------------------|------------------------------------------------------------------------------------------------------------|-----------------------------------------------------------------------------|-------------|---------------------------------------------------------------------------------------------------------------------------------------------------------------------------------------------------------------------------------|
|                                                | A Comparative Randomized Clinical Study on Covid-19 Positive Hospitalized Patients Supplemented With NASAFYTOL                                                                                             | Dietary Supplement: NASAFYTOL®<br>Dietary Supplement: FULTIUM® -D3 800<br>Drug: Standard of care treatment | Polyphenols in combination with other natural bioactive compounds and drugs | NCT04844658 | <a href="https://clinicaltrials.gov/ct2/show/NCT04844658?term=Curcumin&amp;cond=COVID-19&amp;draw=2&amp;rank=8">https://clinicaltrials.gov/ct2/show/NCT04844658?term=Curcumin&amp;cond=COVID-19&amp;draw=2&amp;rank=8</a>       |
| Resveratrol (3,5,4'-trihydroxy-trans-stilbene) | Randomized Double-Blind Placebo-Controlled Proof-of-Concept Trial of Resveratrol, a Plant Polyphenol, for the Outpatient Treatment of Mild Coronavirus Disease (COVID-19)                                  | Drug: Resveratrol<br>Dietary Supplement: Vitamin D3                                                        | Polyphenols in combination with other natural bioactive compounds           | NCT04400890 | <a href="https://clinicaltrials.gov/ct2/show/NCT04400890?term=Resveratrol&amp;cond=COVID-19&amp;draw=2&amp;rank=1">https://clinicaltrials.gov/ct2/show/NCT04400890?term=Resveratrol&amp;cond=COVID-19&amp;draw=2&amp;rank=1</a> |
|                                                | A Pilot Randomized Controlled Clinical Study of Resveratrol for Discharged COVID 19 Patients in Order to Evaluate Its Therapeutic Effects Against Fibrosis                                                 | Drug: Resveratrol                                                                                          | Pure polyphenols                                                            | NCT04799743 | <a href="https://clinicaltrials.gov/ct2/show/NCT04799743?term=Resveratrol&amp;cond=COVID-19&amp;draw=2&amp;rank=2">https://clinicaltrials.gov/ct2/show/NCT04799743?term=Resveratrol&amp;cond=COVID-19&amp;draw=2&amp;rank=2</a> |
|                                                | Can SARS-CoV-2 Viral Shedding in COVID-19 Disease be Reduced by Resveratrol-assisted Zinc Ingestion, a Direct Inhibitor of SARS-CoV-2-RNA Polymerase? A Single Blinded Phase II Protocol (Reszinate Trial) | Dietary Supplement: Zinc Picolinate<br>Dietary Supplement: Resveratrol                                     | Polyphenols in combination with other compounds                             | NCT04542993 | <a href="https://clinicaltrials.gov/ct2/show/NCT04542993?term=Resveratrol&amp;cond=COVID-19&amp;draw=2&amp;rank=3">https://clinicaltrials.gov/ct2/show/NCT04542993?term=Resveratrol&amp;cond=COVID-19&amp;draw=2&amp;rank=3</a> |
|                                                | Retrospective Observational Study to Describe the Evolution of SARS-CoV-2 Disease and the Profile of Patients Treated or Not With Imuno TF® and a Combination of Nutraceuticals                            | Dietary Supplement: ImmuFormulation                                                                        | Polyphenols in combination with other natural bioactive compounds           | NCT04666753 | <a href="https://clinicaltrials.gov/ct2/show/NCT04666753?term=Resveratrol&amp;cond=COVID-19&amp;draw=2&amp;rank=4">https://clinicaltrials.gov/ct2/show/NCT04666753?term=Resveratrol&amp;cond=COVID-19&amp;draw=2&amp;rank=4</a> |

|            |                                                                                                                                                                                                                                        |                                                                                         |                                                       |             |                                                                                                                                                                                                                               |
|------------|----------------------------------------------------------------------------------------------------------------------------------------------------------------------------------------------------------------------------------------|-----------------------------------------------------------------------------------------|-------------------------------------------------------|-------------|-------------------------------------------------------------------------------------------------------------------------------------------------------------------------------------------------------------------------------|
|            | and Who Have Tested Positive for COVID-19                                                                                                                                                                                              |                                                                                         |                                                       |             |                                                                                                                                                                                                                               |
| Oleuropein | Assessment of the Clinical Effectiveness of Standardized Olive Leaf Capsules; as a Co-therapy in the Treatment of Non-hospitalized COVID-19 Patients; a Randomized Clinical Trial                                                      | Dietary Supplement: Nusapure standardized olive leaves capsule, 750 mg (50% oleuropein) | Polyphenol-rich extracts                              | NCT04873349 | <a href="https://clinicaltrials.gov/ct2/show/NCT04873349?term=Oleuropein&amp;cond=COVID-19&amp;draw=2&amp;rank=1">https://clinicaltrials.gov/ct2/show/NCT04873349?term=Oleuropein&amp;cond=COVID-19&amp;draw=2&amp;rank=1</a> |
|            | Evaluation of the Immunomodulatory and Preventive Effects of Olive Leaf Tea Against COVID-19                                                                                                                                           | Dietary Supplement: Olive Leaf Tea                                                      | Polyphenol-rich extracts                              | NCT05222347 | <a href="https://clinicaltrials.gov/ct2/show/NCT05222347?term=Oleuropein&amp;cond=COVID-19&amp;draw=2&amp;rank=2">https://clinicaltrials.gov/ct2/show/NCT05222347?term=Oleuropein&amp;cond=COVID-19&amp;draw=2&amp;rank=2</a> |
| Caffeine   | A Non-Randomized, Multiple-Dose, Open-Label, Single Sequence Study To Evaluate The Effect Of Concomitant Administration Of Edp-235 On The Pharmacokinetics And Safety Of Midazolam, Caffeine, And Rosuvastatin In Healthy Participants | Drug: EDP-235<br>Drug: Midazolam<br>Drug: Rosuvastatin<br>Drug: Caffeine                | Natural bioactive compounds in combination with drugs | NCT05594615 | <a href="https://clinicaltrials.gov/ct2/show/NCT05594615?term=Caffeine&amp;cond=COVID-19&amp;draw=2&amp;rank=1">https://clinicaltrials.gov/ct2/show/NCT05594615?term=Caffeine&amp;cond=COVID-19&amp;draw=2&amp;rank=1</a>     |
|            | 1,3,7-Trimethylxanthine as a Treatment of COVID-19: Results of a Controlled Study                                                                                                                                                      | Other: Data collection                                                                  | Natural bioactive compounds                           | NCT04395742 | <a href="https://clinicaltrials.gov/ct2/show/NCT04395742?term=Caffeine&amp;cond=COVID-19&amp;draw=2&amp;rank=2">https://clinicaltrials.gov/ct2/show/NCT04395742?term=Caffeine&amp;cond=COVID-19&amp;draw=2&amp;rank=2</a>     |
| Eugenol    | Physical Activity and Sensory Trainings to Help COVID-19 Patients Recover From Persistent Smell and Taste Impairments - A Pilot Study                                                                                                  | Behavioral: Physical activity<br>Other: Smell training                                  | Natural bioactive compounds                           | NCT05037110 | <a href="https://clinicaltrials.gov/ct2/show/NCT05037110?term=Eugenol&amp;cond=COVID-19&amp;draw=2&amp;rank=1">https://clinicaltrials.gov/ct2/show/NCT05037110?term=Eugenol&amp;cond=COVID-19&amp;draw=2&amp;rank=1</a>       |
|            | L'entraînement Olfactif Comme Traitement de la Dysfonction Olfactive Post COVID-19                                                                                                                                                     | Other: Smell training                                                                   | Natural bioactive compounds                           | NCT05384561 | <a href="https://clinicaltrials.gov/ct2/show/NCT05384561?term=Eugenol&amp;cond=COVID-19&amp;draw=2&amp;rank=2">https://clinicaltrials.gov/ct2/show/NCT05384561?term=Eugenol&amp;cond=COVID-19&amp;draw=2&amp;rank=2</a>       |
|            | Olfactory Retraining Therapy and Budesonide Nasal Rinse for Anosmia Treatment in Patients                                                                                                                                              | Other: Olfactory retraining                                                             | Natural bioactive compounds in combination with drugs | NCT04374474 | <a href="https://clinicaltrials.gov/ct2/show/NCT04374474?term=Eugenol&amp;cond=COVID-19&amp;draw=2&amp;rank=3">https://clinicaltrials.gov/ct2/show/NCT04374474?term=Eugenol&amp;cond=COVID-19&amp;draw=2&amp;rank=3</a>       |

|                                                 |                                                                                                        |
|-------------------------------------------------|--------------------------------------------------------------------------------------------------------|
| Post-CoVID 19. A Randomized<br>Controlled Trial | Drug: corticosteroid<br>nasal irrigation<br>Other: smell household<br>Items<br>Other: Nasal Irrigation |
|-------------------------------------------------|--------------------------------------------------------------------------------------------------------|
